# Supplementary material
Source: PubMed Central journal article supplement (PMC3315227)
Supplement: supp_tpc.111.091306_Supplemental_Data.pdf [file supp_tpc.111.091306_Supplemental_Data.pdf]

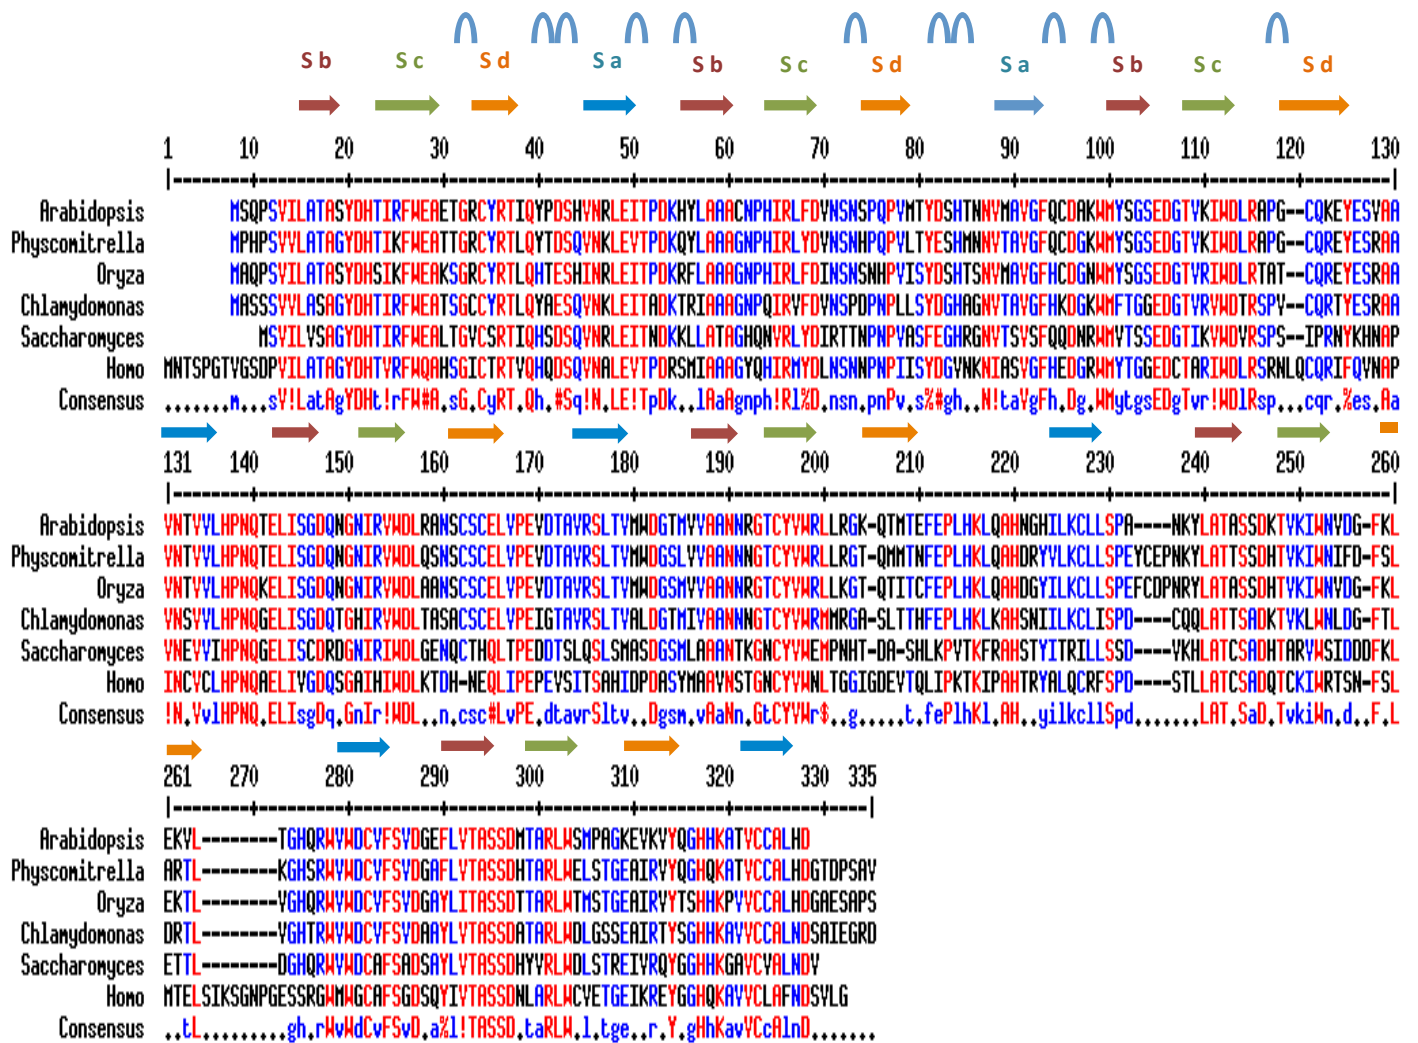

**Supplemental Figure 1:** Alignment of plants, yeast and human LST8 protein sequences. Predicted turns and loops are, respectively, shown on top in red and blue. Each WD 40 repeat contains four  $\beta$  strands (Sa to Sd) which are only shown for the beginning and the end of the sequences. Conserved residues are shown in red.

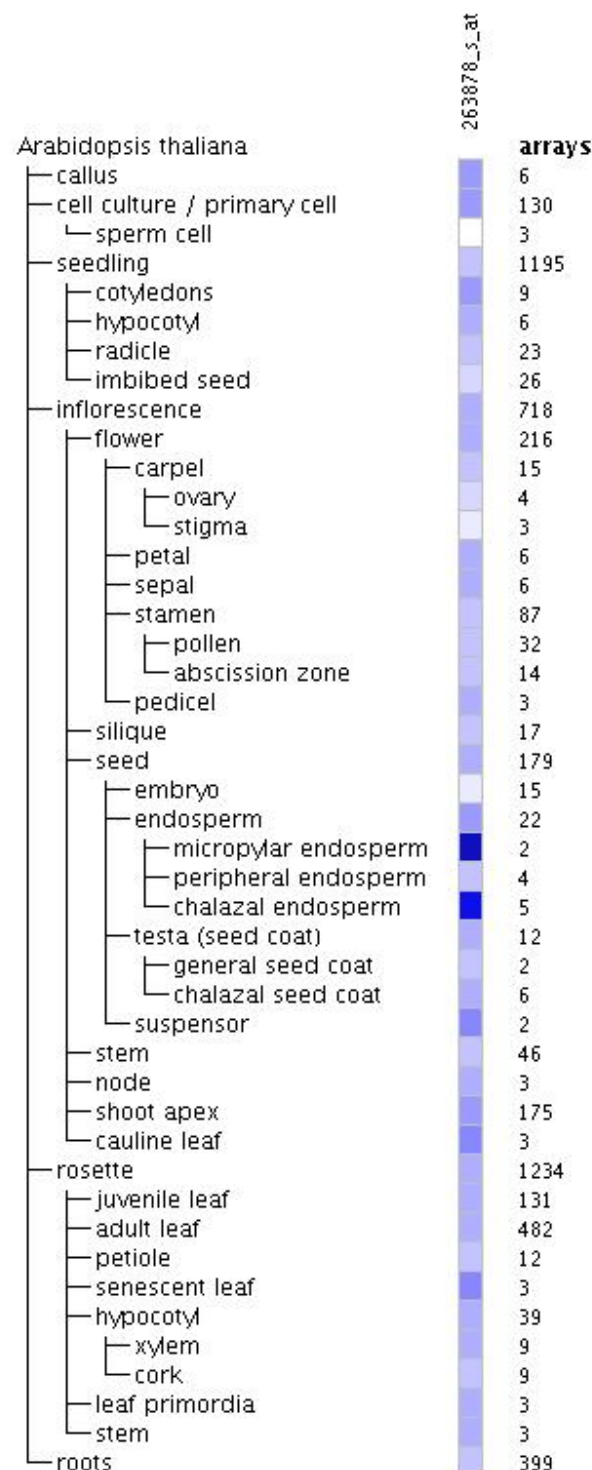

**Supplemental Figure 2 :** Expression of the Arabidopsis *LST8* genes in various organs. The expression level is correlated to the intensity of the color. Data are from the Genevestigator website (genevestigator.com).

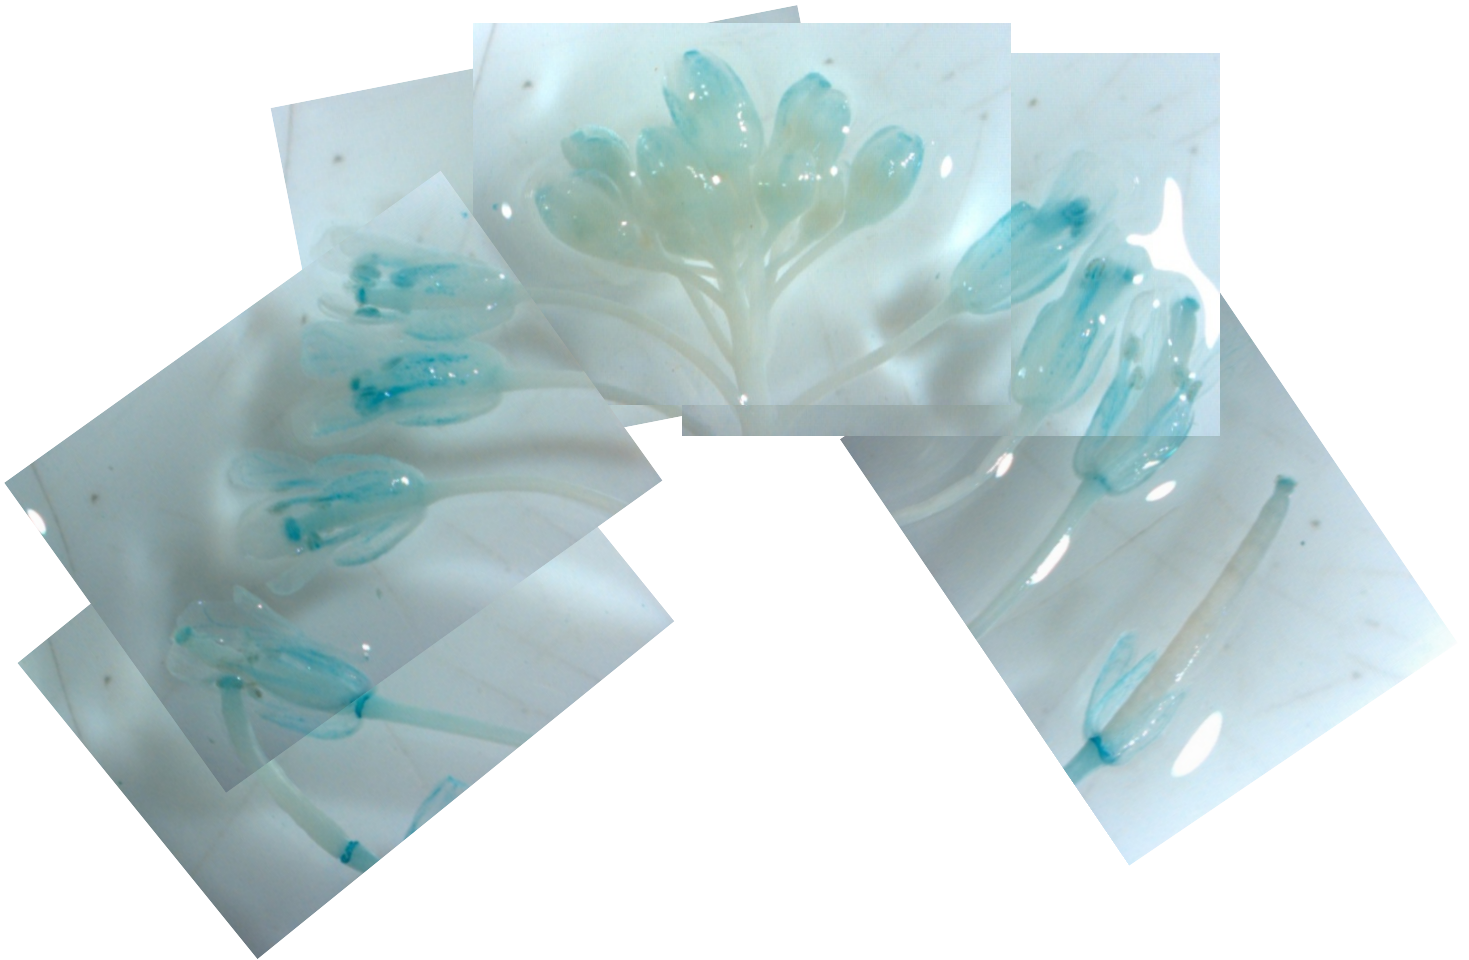

**Supplemental Figure 3 :** GUS staining of a transformed Arabidopsis plants carrying a pLst8:*GUS* construct containing 1kb of *LST8-1* promoter. Reconstitution of a stained inflorescence.

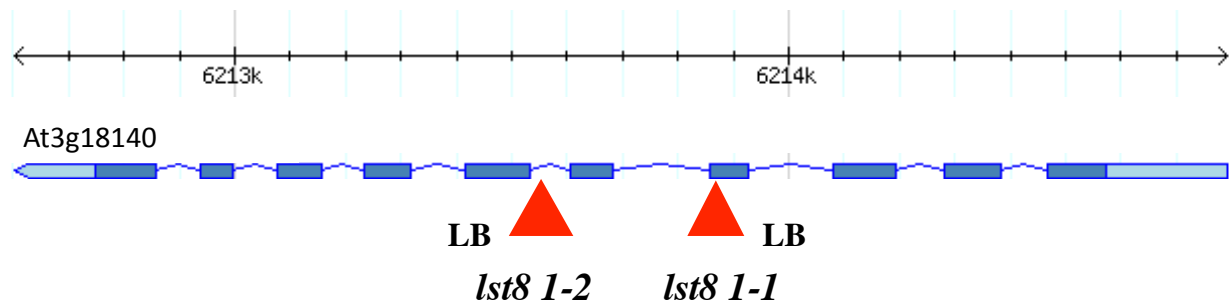

**Supplemental Figure 4** : Position of the T-DNA insertions in the *lst8-1* mutants.

LB indicates the left borders of the inserted T-DNAs.

*lst8-1-1*: Salk collection

*lst8-1-2*: Sail collection

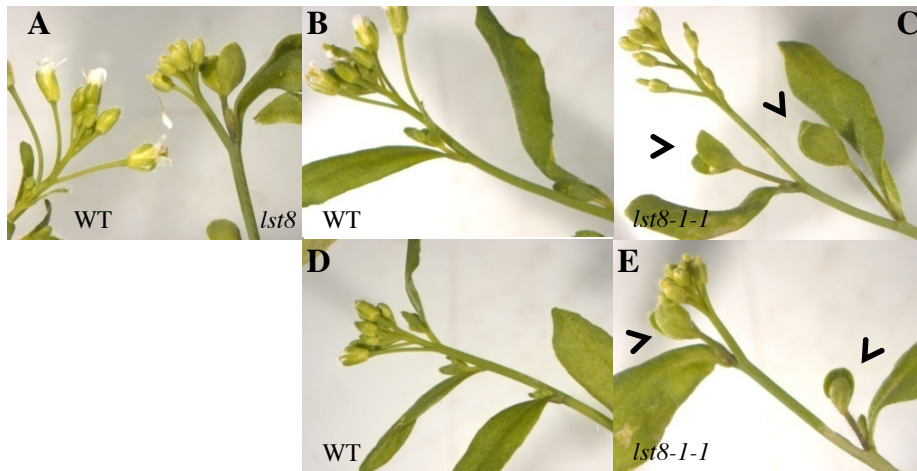

**Supplemental Figure 5 :** Mutations in *LST8-1* gene affect stem and flower bud morphology and organization. (A) *lst8-1-1* mutant on the right fails to develop normal flowers compared to the WT on the left. Flowers formed by *lst8-1-1* mutant stay small and unexpanded (C, E) compared to WT ones (B, D). Moreover axillary buds in *lst8-1-1* mutant inflorescence appear larger and emerging stems are longer and more developed (C, E, black arrows) compared to WT (B, D).

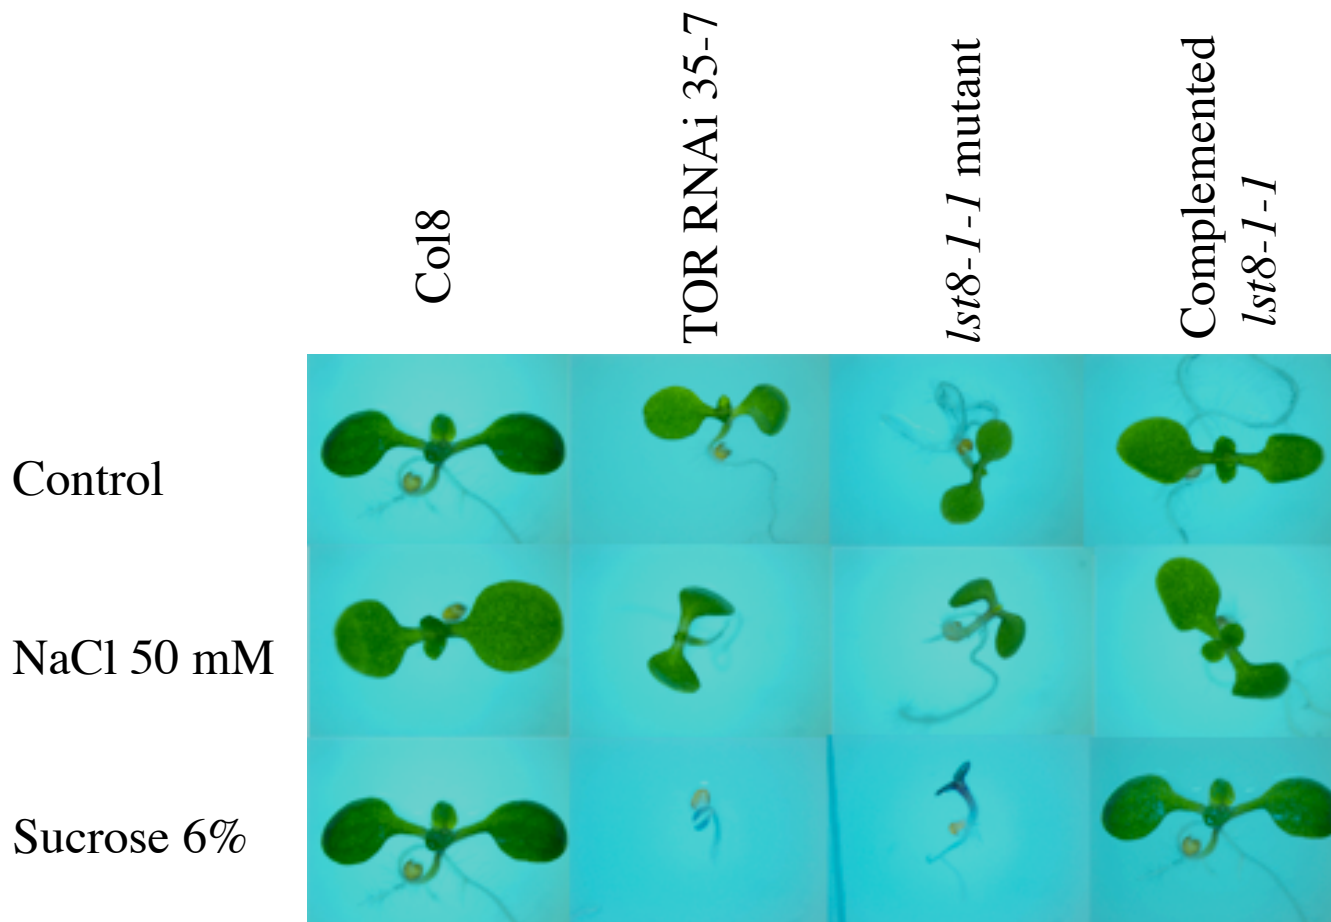

**Supplemental Figure 8 :** Germinating plantlets from the *lst8-1* mutant line display the same sensitivity to high sugar concentrations as a TOR RNAi line.

Seeds from the *lst8-1-1* mutant were sown in vitro on MS/2 medium and grown for 8 days in long day conditions with seeds from the TOR RNAi line 35-7 and a complemented *lst8-1-1* mutant.

The *lst8-1-1* mutant was complemented by pLst8:Lst8 cDNA construct (see Methods for details).

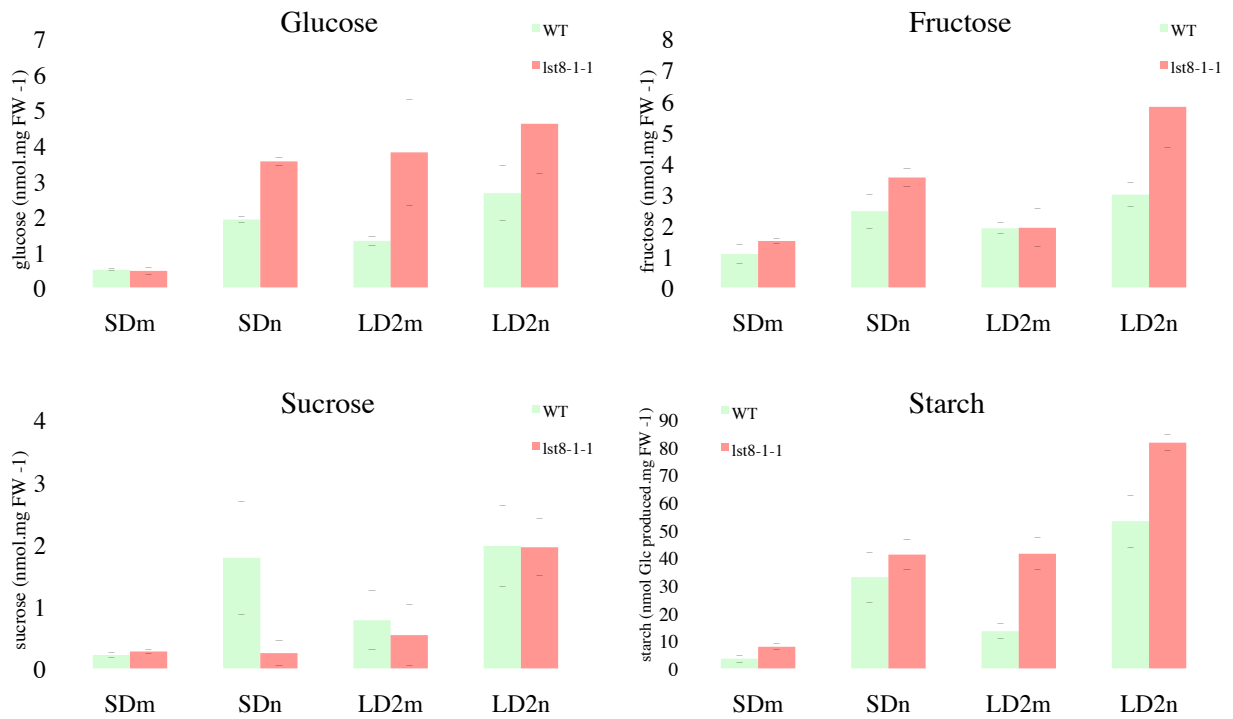

**Supplemental Figure 9 :** Diurnal variations in sugar and starch contents during the transition from short days (SD) to long days (LD) in the wild-type (WT) and in the *lst8-1-1* mutant. Plants were first grown in controlled SD conditions and harvested at the beginning (morning, m) and end (night, n) of the day preceding the shift to LD. Plants were again harvested at day two after the start of LD conditions. Results are mean of at least three different samples  $\pm$  SD

A

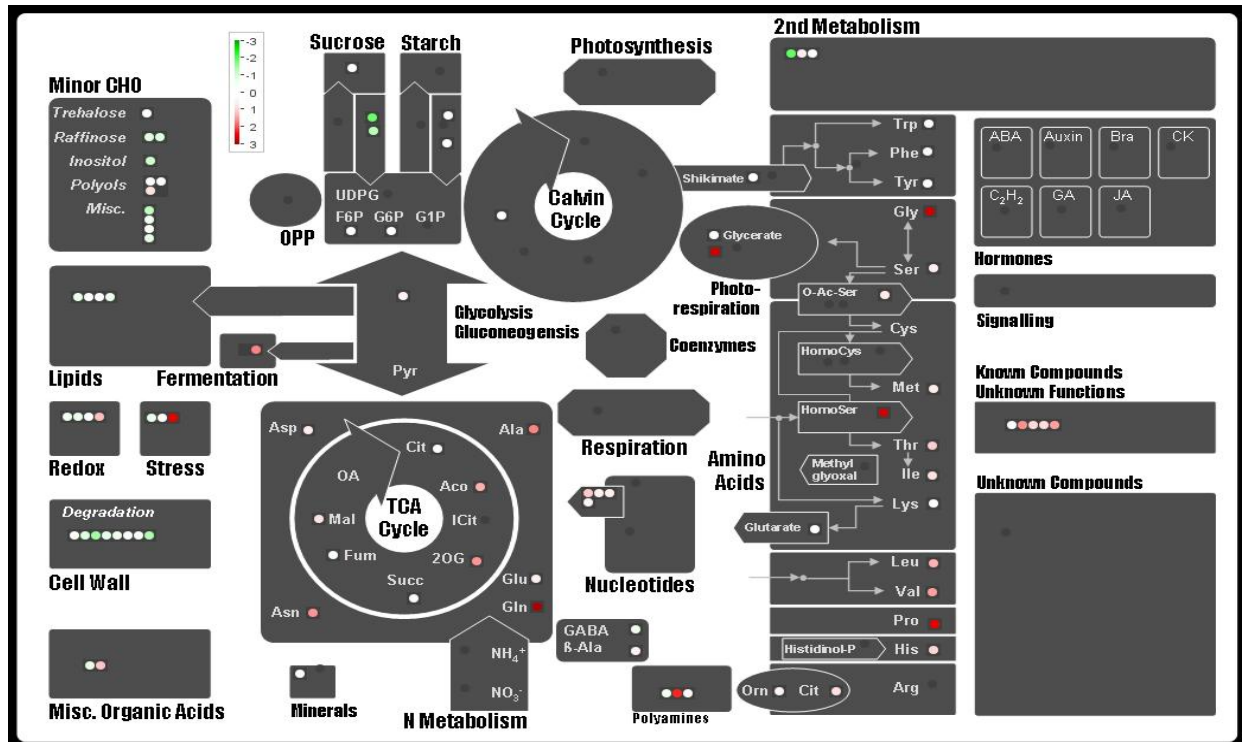

B

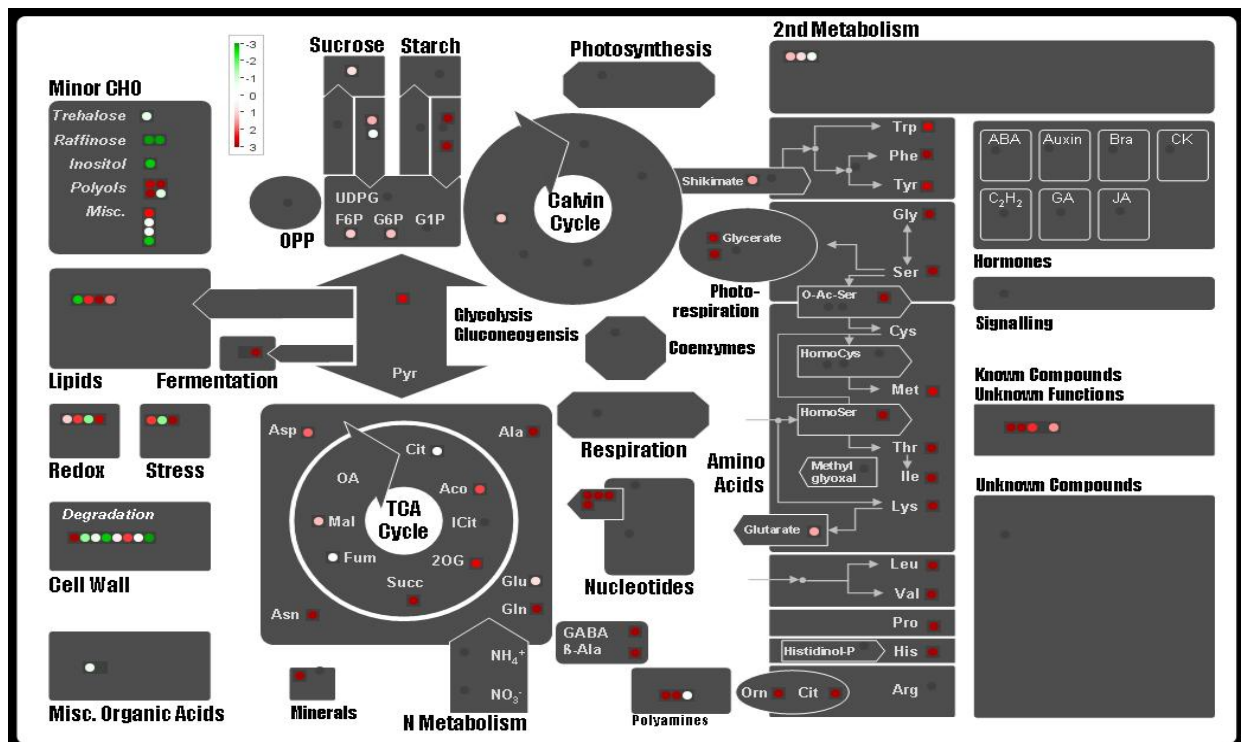

**Supplemental Figure :** Mapman representations of metabolite variations in *lsd8-1-2* mutants using global GC-MS analysis. Leaves from the *lsd8-1-2* mutants were collected from (A) short-day grown plants or (B) after transfer to long-day conditions for 12 days and relative metabolite accumulations were compared with WT plants grown in the same conditions.

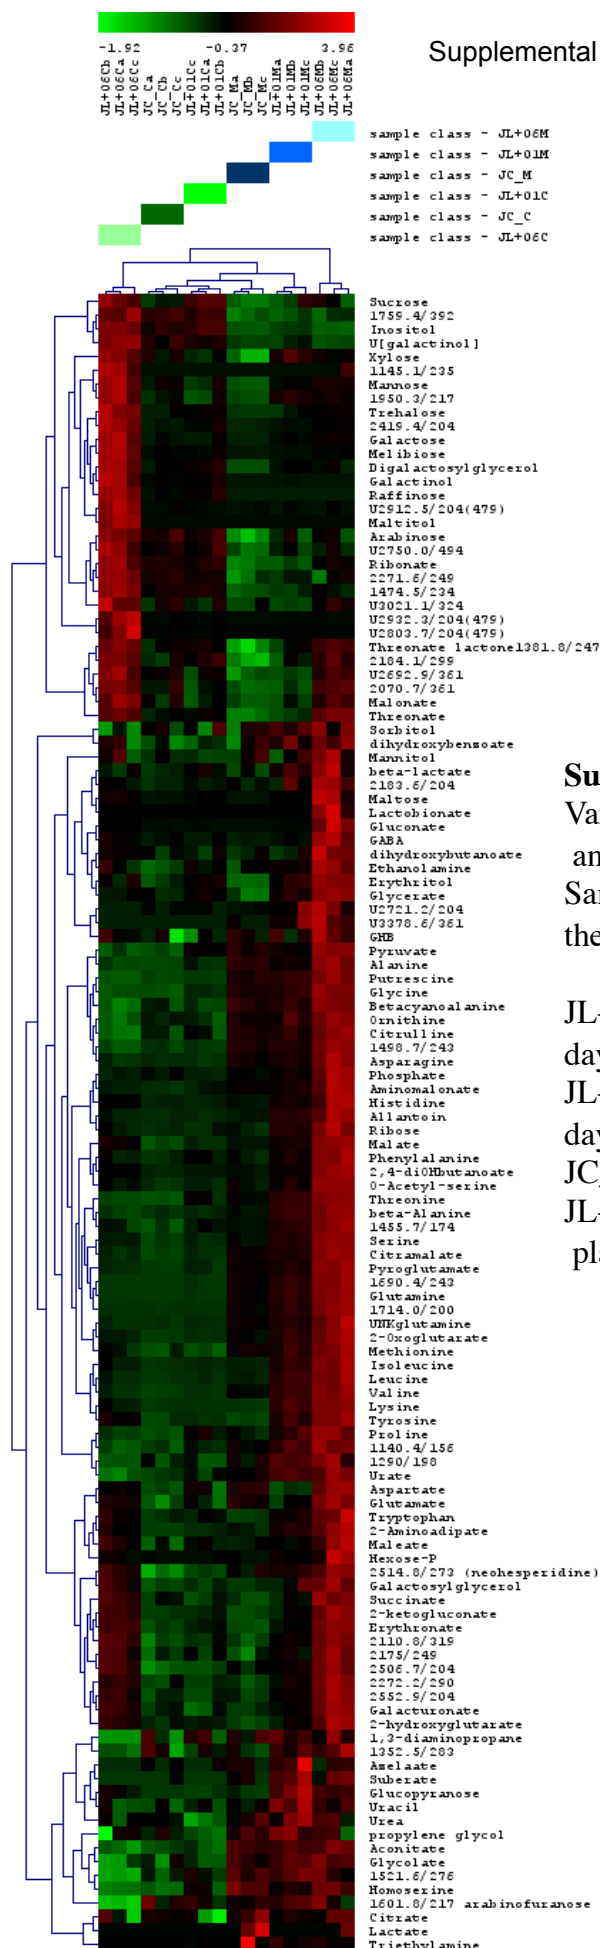

## Supplemental Figure 9:

Variations in metabolite levels in *lst8-1-2* mutants and WT plants exposed to long days.

Samples and metabolites were clustered. The color scale shows the concentrations ratios in log2.

JL+06M: *lst8-1-2* mutant after 6 days of transfer to long-days conditions (triplicate)

JL+01M: same after one day of transfer to long-days conditions (triplicate)

JC\_M: *lst8-1-2* mutant grown in short-days conditions

JL+01C, JL+06C, JC\_C: same as above for the WT control plants (triplicate).

A

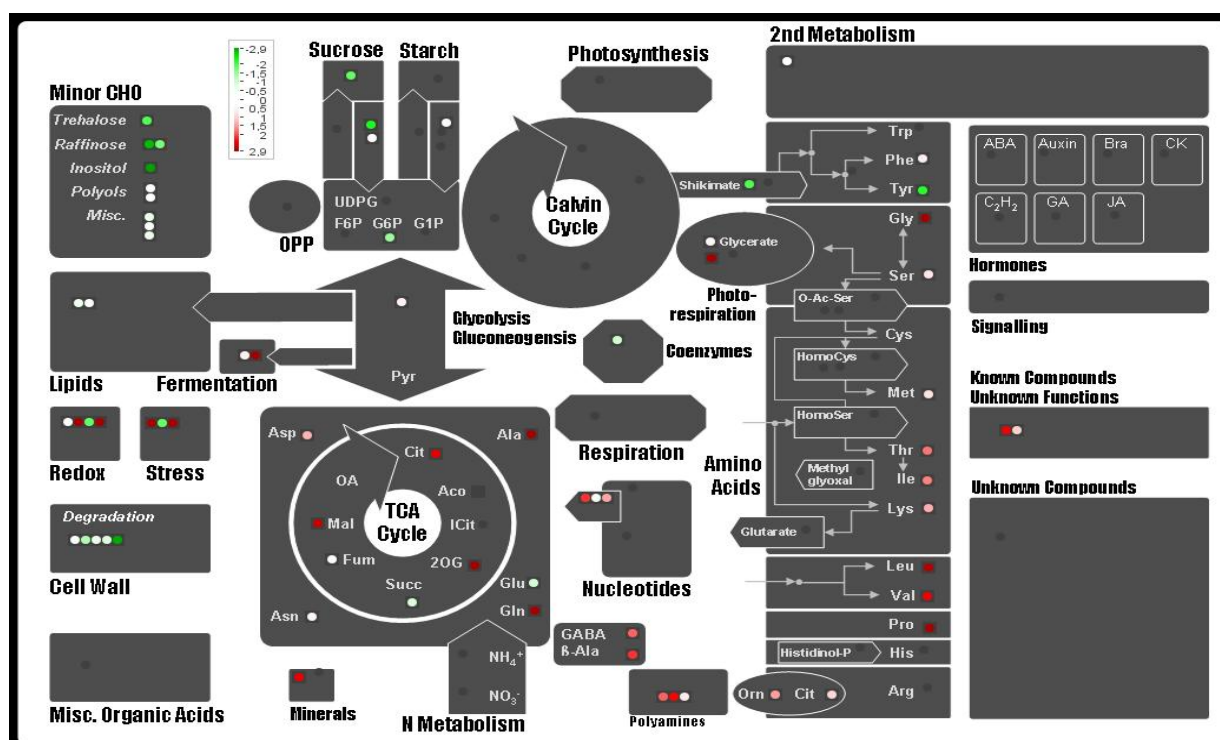

B

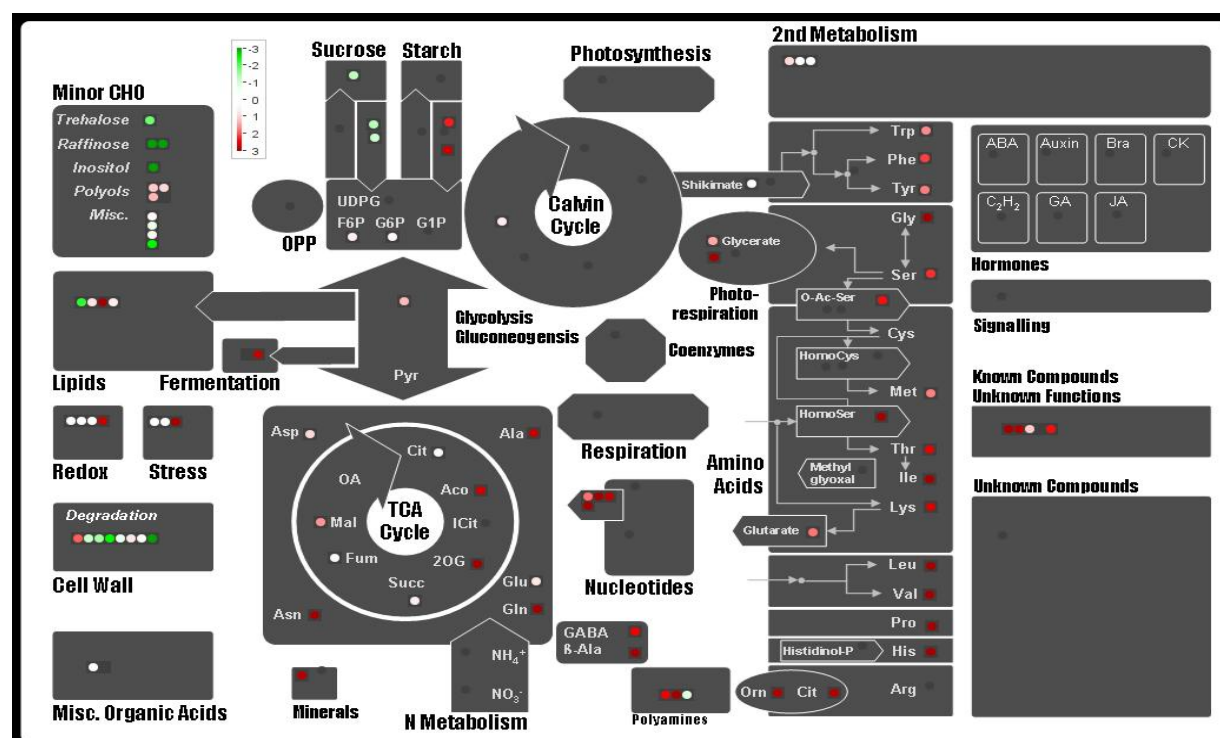

**Supplemental Figure 10** : Mapman representations of global metabolite analysis using GC-MS in *lst8-1* mutants.

Rosettes from the *lst8-1* mutants were collected after transfer to long-day conditions for 6 days and relative metabolite accumulation was compared with WT plants grown in the same conditions.

A: *lst8-1-1* mutant; B: *lst8-1-2* mutant.

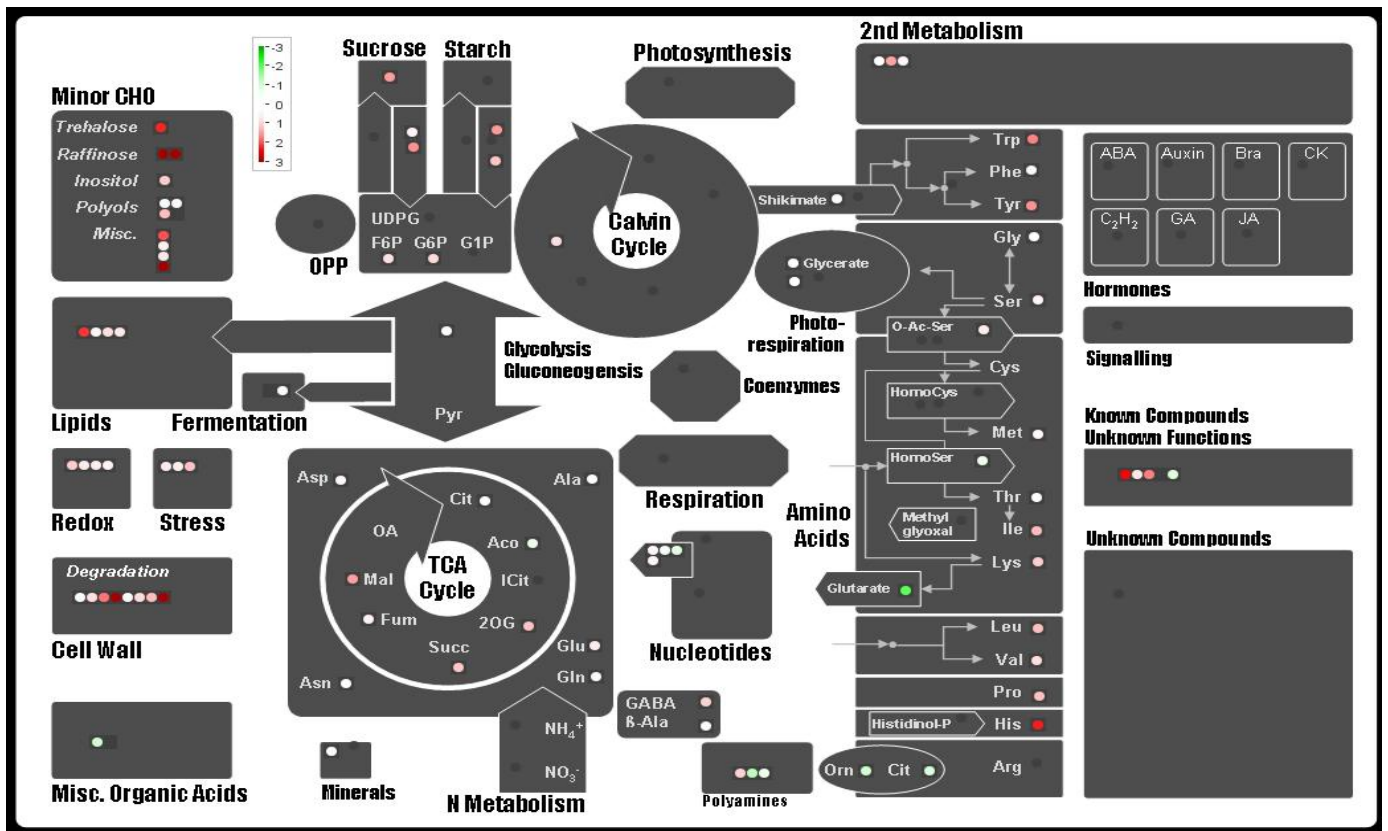

**Supplemental Figure 11:** Mapman representations of global metabolite analysis using GC-MS in WT plants.

Leaves from the WT plants were collected after transfer to long-day conditions for 6 days and relative metabolite accumulation was compared with WT plants grown in short days.

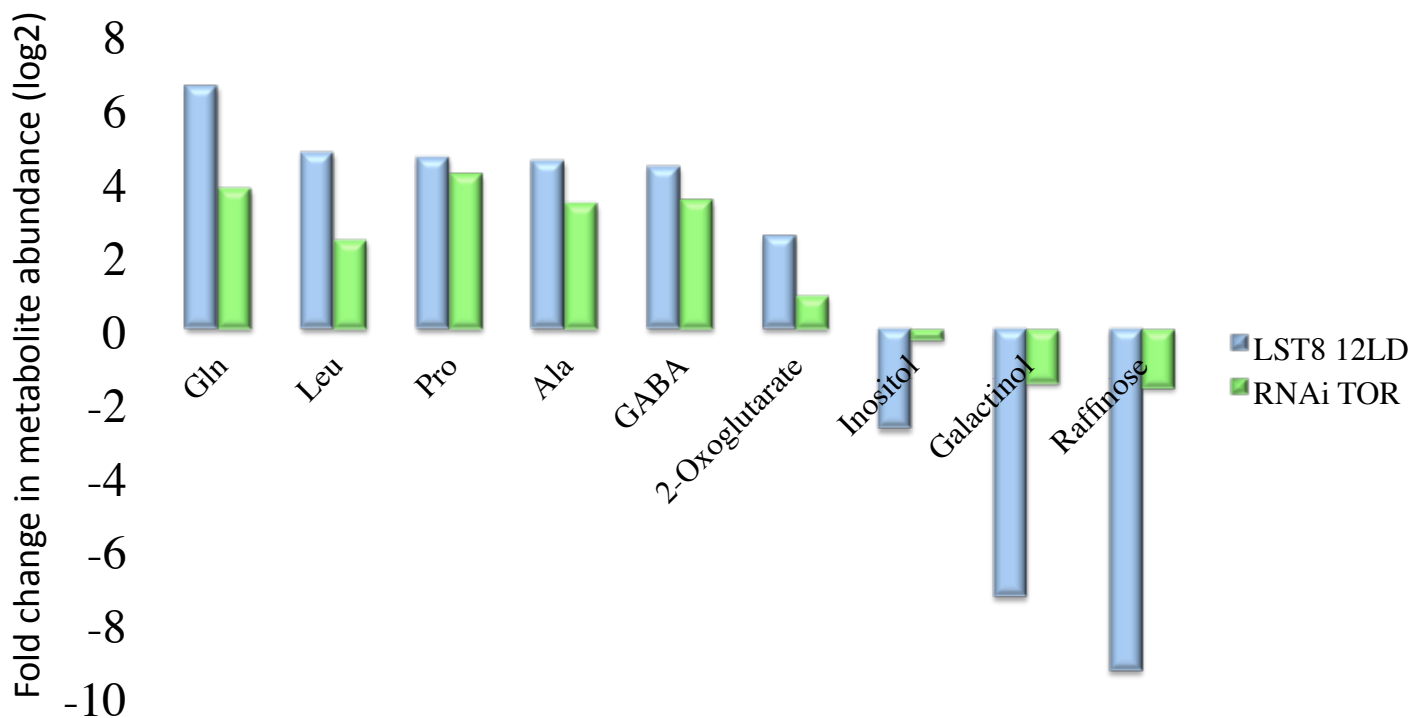

**Supplemental Figure 12:** Changes in metabolite accumulations determined by GC-MS in the *lst8-1-2* mutant and in TOR inducible RNAi lines.

**LST8 12LD:** Leaves from the *lst8-1-2* mutant plants were collected after transfer to long-day conditions for 12 days and relative accumulations were compared for some metabolites with WT plants grown in the same conditions (see Figure 12 for details).

**RNAi TOR:** The two independent inducible TOR RNAi lines were induced with ethanol for 2 days and relative metabolite accumulation was compared with control plants grown in the same conditions (see Methods for details). Galactinol and raffinose were measured in dark-grown plantlets sown on ethanol. Ratio were obtained from the means of three independent samples for each of the two RNAi lines.

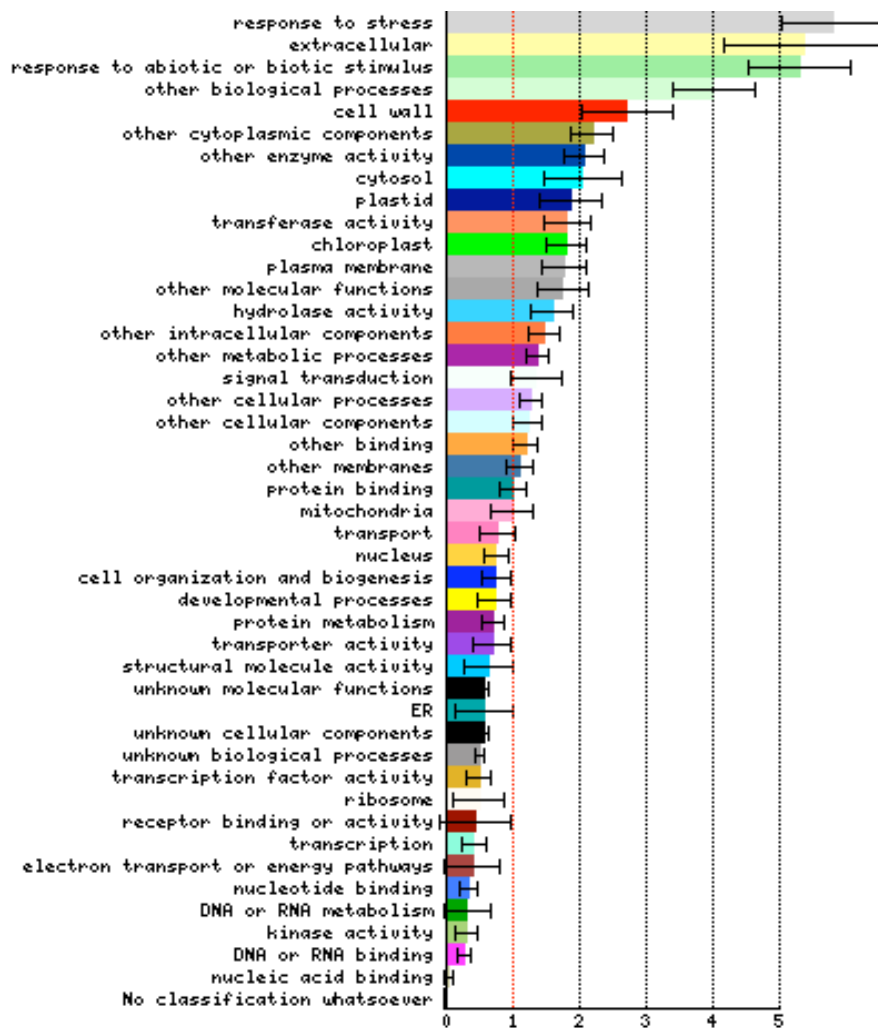

**Supplemental Figure 13 :** Frequency of functional classes in the genes down-regulated in *lst8-1* mutants grown in short-day conditions and compared to WT plants grown in short days. Results have been obtained from the BAR site (<http://bar.utoronto.ca>) using the classification SuperViewer. The input set has been bootstrapped 100 times to estimate the reliability of the data. The resulting mean values are shown together with standard deviations.

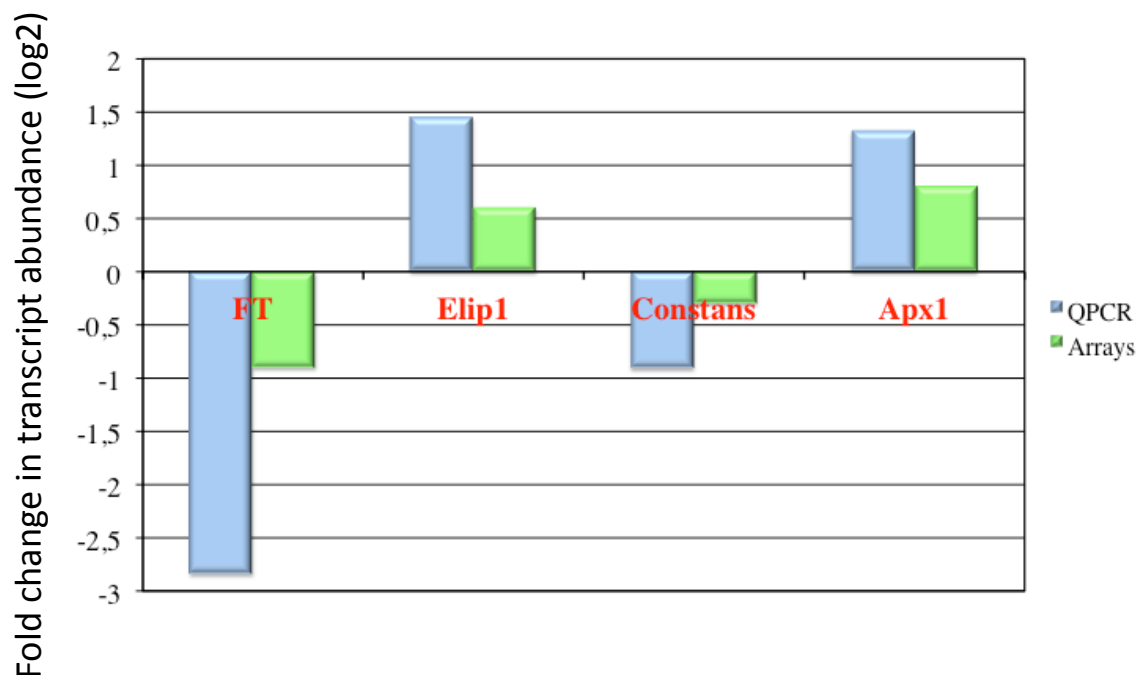

**Supplemental Figure 14** : Changes in transcript abundance determined by either quantitative real-time RT-PCR (QPCR) or microarray hybridizations.

Leaves from the *lst8-1* mutant lines were collected after transfer to long-day conditions for 2 days and relative changes in transcript abundance were measured for the indicated genes (see Figure 13 for details). Gene-specific primers for RT-PCR amplification are the ones used for the microarrays gene-specific tag (GST) amplification (see Methods for details and <http://urgv.evry.inra.fr/projects/FLAGdb>++ for the corresponding sequences).

FT: Flowering locus T

Elip1: Early light-induced protein 1

Apx1: Ascorbate peroxidase 1

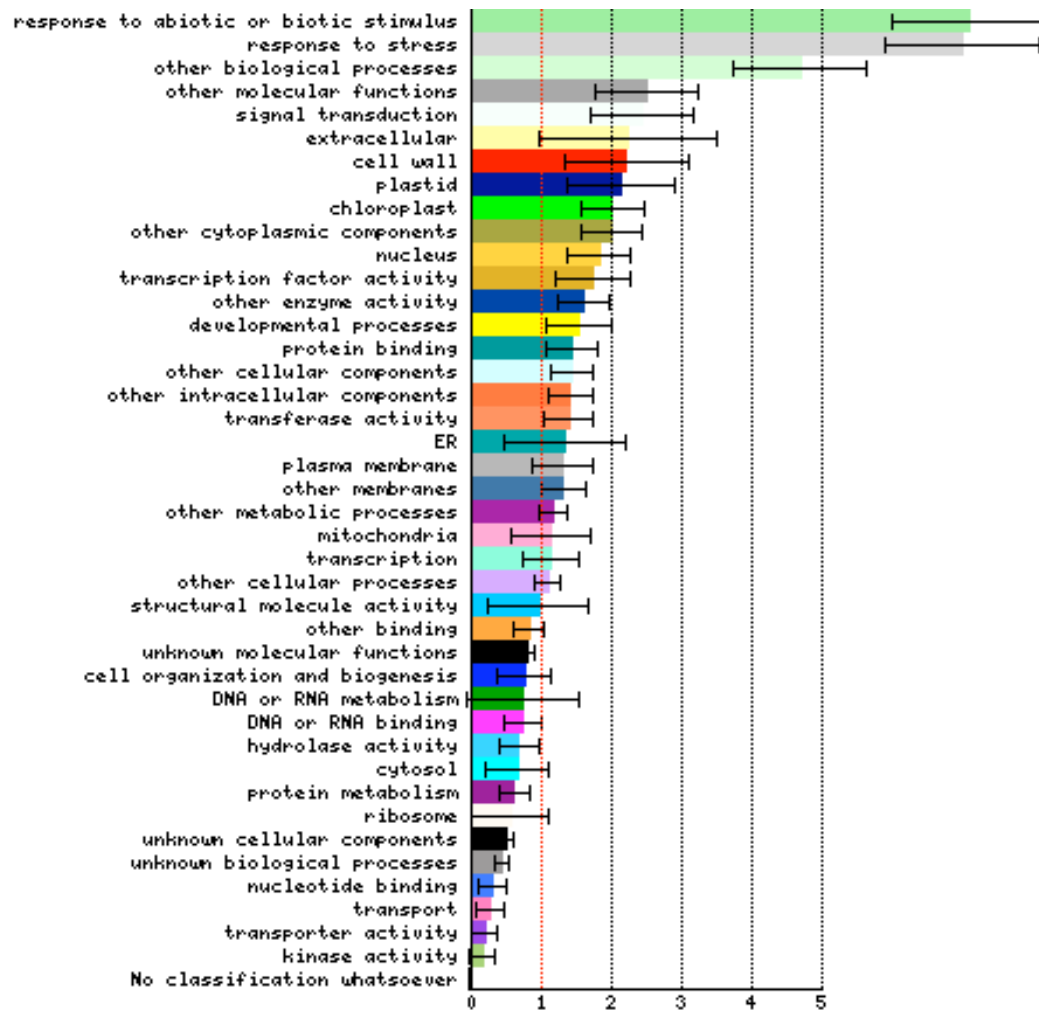

**Supplemental Figure 15:** Frequency of functional classes in the genes down-regulated in *lst8-1* mutants after two days under long-day conditions when compared to WT plants grown in the same conditions.

Results have been obtained from the BAR site (<http://bar.utoronto.ca>) using the classification SuperViewer. The input set has been bootstrapped 100 times to estimate the reliability of the data. The resulting mean values are shown together with standard deviations.

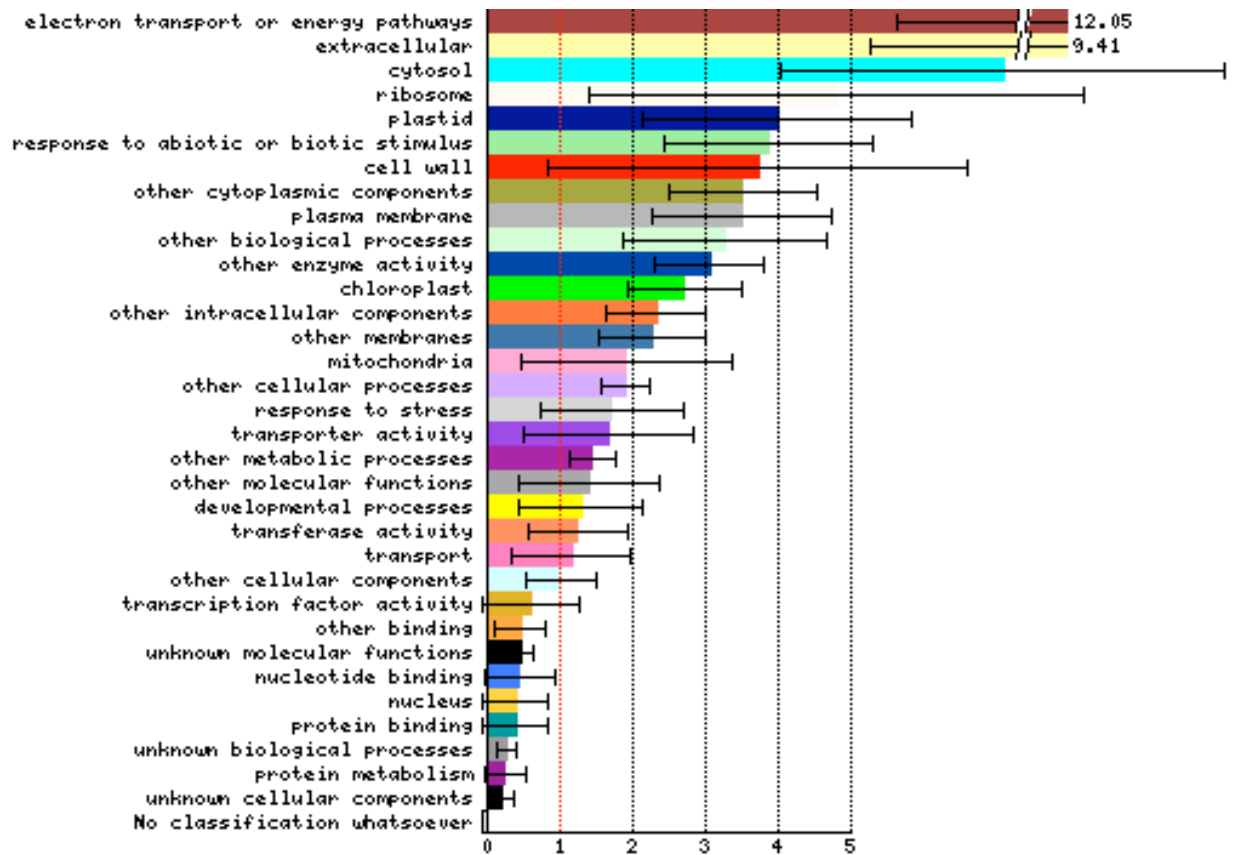

**Supplemental Figure 16 :** Frequency of functional classes in the genes up-regulated in *lst8-1* mutants after two days in long-day conditions when compared to WT plants grown in the same conditions.

Results have been obtained from the BAR site (<http://bar.utoronto.ca>) using the classification SuperViewer. The input set has been bootstrapped 100 times to estimate the reliability of the data. The resulting mean values are shown together with standard deviations.

|                    |             |               |                                               |                     |
|--------------------|-------------|---------------|-----------------------------------------------|---------------------|
| LST8-1 (At3g18140) | SALK 02459  | 02459-F       | AGG AGA GGA TGA AGA AAA CGG                   | Genotyping          |
|                    |             | 02459-R       | TTG CTT CCT TCT ACC TGC TTG                   |                     |
| LST8-1 (At3g18140) | SAIL 641D10 | 02459-R       | TTG CTT CCT TCT ACC TGC TTG                   |                     |
|                    |             | LST8 1-R      | CAG TGG CTT TGT GAT GAC CTT                   |                     |
| T-DNA primer       | SALK line   | Lba-1         | TGG TTC ACG TAG TGG GCC ATC G                 |                     |
|                    | SAIL line   | LB3-SAIL      | TAG CAT CTG AAT TTC ATA ACC AAT CTC GAT ACA C |                     |
| LST8-1 (At3g18140) |             | LST8-18140-5' | ATC GAT CGA AAA TGA GTC AGC                   | RT-PCR              |
|                    |             | LST8-18140-3' | CTT ATT AAG GTT TTA ATC GTG A                 |                     |
| Lst8-2 (At2g22040) |             | LST8-22040-5' | ACA AAC CGG ATG ATA GTC CC                    | RT-PCR              |
|                    |             | LST8-22040-3' | ACA GGA TTT AAT CAC GCA GT                    |                     |
| LST8-1 (At3g18140) |             | LST8-1 F      | GTT TGG GAC TGC GTC TTC TC                    | Quantitative RT-PCR |
|                    |             | LST8-18140-3' | CTT ATT AAG GTT TTA ATC GTG A                 |                     |

|        |                                                 |                                            |
|--------|-------------------------------------------------|--------------------------------------------|
| LST8-1 | 1kb promoter forward with <i>EcoRI</i> site     | ATG AAT TCG ATA GAA CAG AGG TTA AGA AC     |
| LST8-1 | 1kb promoter reverse with <i>NotI</i> site      | ATT AGC GGC CGC TTT CGA TCG ATT TTA TCC CG |
| LST8-1 | 1 kb promoter forward with <i>BamHI</i> site    | CGG GAT CCG ATA GAA CAG AGG TTA AGA AC     |
| LST8-1 | Gene 3' end with <i>NotI</i> site               | TGC TGC GGC CGC AGG TTT TAA TCG TGA AGT GC |
| LST8-1 | Start of coding sequence with <i>Sall</i> site  | CGA AGT CGA CTA TGA GTC AGC CTT CT         |
| LST8-1 | Start of coding sequence with <i>EcoRI</i> site | AGG AAT TCA CCA TGA GTC AGC CT             |
| LST8-1 | End of coding sequence with <i>NotI</i> site    | TGC TGC GGC CGC TTT AAA TCG TGA AG         |

Supplemental Table 1 : Primer sequences
